# Supplementary material for: Response of Soil Microbes to Vegetation Restoration in Coal Mining Subsidence Areas at Huaibei Coal Mine, China
Source: PubMed Central journal article supplement (PMC6572236; doi:10.3390/ijerph16101757), 2019-05-17
Supplement: ijerph-16-01757-s001.pdf [file ijerph-16-01757-s001.pdf]

**Supplementary Table S1.** Name of the reagents and instruments used in Illumina MiSeq highthroughput sequencing.

| Reagents and Instruments                                            | Manufacturers   | Model       |
|---------------------------------------------------------------------|-----------------|-------------|
| Centrifuge                                                          | Eppendorf       | 5415D       |
| Nanodrop                                                            | Thermo          | 2000c       |
| PCR                                                                 | Bioer           | XP cyclor   |
| Gel imaging system                                                  | Bio-Rad         | Gel-Doc     |
| Qubit2.0                                                            | Life Tech       | Q32866      |
| Nucleic acid analyzer                                               | Agilent         | 2100        |
| Fluorescent Quantitative PCR                                        | Eppendorf       | Realplex4S  |
| High throughput sequencer                                           | Illumina        | Miseq       |
| PowerSoil DNA Isolation Kit                                         | MO BIO          | 12888-100   |
| Phusion High-Fidelity PCR Master Mix                                | NEB             | M0531       |
| Agencourt AMPure XP 60ml Kit                                        | Beckman Coulter | A63881      |
| AXYGEN Gel Extraction Kit (250)                                     | AXYGEN          | AP-GX-250G  |
| Qubit dsDNA HS Assay Kit                                            | Life tech       | Q32851      |
| Library Quant Kit illumina GA revised primer-SYBR Fast<br>Universal | KAPA            | KK4824      |
| MiSeq Reagent Kit v3 (600 cycle)                                    | illumina        | MS-102-3003 |
